# Supplementary material
Source: publisher site journal article supplement (https://www.dovepress.com/article/494570)
Supplement: Supplementary file 1 [file get_supplementary_file.php]

**Supplementary Table S1** Detailed information on SNPs in Primary biliary cholangitis in forward MR analysis

| **SNP** | **Effect Allele** | **Other Allele** | **EAF** | **BETA** | **SE** | **P-Value** | **R2** | **F statistic** | **Overall R2** | **Overall F statistic** |
| --- | --- | --- | --- | --- | --- | --- | --- | --- | --- | --- |
| rs10488631 | C | T | 0.100 | 0.460 | 0.047 | 0.000 | 0.038 | 525.659 | 0.036 | 506.377 |
| rs11065987 | G | A | 0.420 | 0.180 | 0.033 | 0.000 | 0.016 | 211.596 |  |  |
| rs12924729 | A | G | 0.343 | -0.272 | 0.036 | 0.000 | 0.033 | 455.881 |  |  |
| rs1372072 | A | G | 0.367 | 0.180 | 0.033 | 0.000 | 0.015 | 202.231 |  |  |
| rs17641524 | T | C | 0.183 | 0.255 | 0.038 | 0.000 | 0.019 | 262.758 |  |  |
| rs1800693 | C | T | 0.425 | 0.195 | 0.032 | 0.000 | 0.019 | 250.201 |  |  |
| rs2069235 | A | G | 0.299 | 0.237 | 0.035 | 0.000 | 0.024 | 320.318 |  |  |
| rs2293370 | A | G | 0.164 | -0.348 | 0.044 | 0.000 | 0.033 | 455.047 |  |  |
| rs2297067 | T | C | 0.238 | 0.324 | 0.036 | 0.000 | 0.038 | 523.461 |  |  |
| rs2304256 | A | C | 0.262 | -0.241 | 0.037 | 0.000 | 0.023 | 305.574 |  |  |
| rs35464393 | C | T | 0.655 | 0.388 | 0.053 | 0.000 | 0.068 | 966.328 |  |  |
| rs3745516 | G | A | 0.770 | -0.332 | 0.036 | 0.000 | 0.039 | 538.424 |  |  |
| rs3771317 | C | T | 0.144 | 0.344 | 0.045 | 0.000 | 0.029 | 398.380 |  |  |
| rs4780355 | C | T | 0.334 | -0.245 | 0.036 | 0.000 | 0.027 | 363.593 |  |  |
| rs485499 | C | T | 0.349 | -0.345 | 0.035 | 0.000 | 0.054 | 758.190 |  |  |
| rs4938573 | T | C | 0.808 | 0.332 | 0.045 | 0.000 | 0.034 | 469.105 |  |  |
| rs510372 | T | C | 0.383 | -0.206 | 0.034 | 0.000 | 0.020 | 269.956 |  |  |
| rs6679356 | T | C | 0.828 | -0.417 | 0.038 | 0.000 | 0.050 | 689.775 |  |  |
| rs7665090 | G | A | 0.493 | 0.199 | 0.032 | 0.000 | 0.020 | 267.173 |  |  |
| rs7774434 | C | T | 0.429 | 0.518 | 0.033 | 0.000 | 0.131 | 2004.173 |  |  |
| rs860413 | C | A | 0.287 | -0.248 | 0.038 | 0.000 | 0.025 | 341.870 |  |  |
| rs911263 | T | C | 0.650 | 0.219 | 0.037 | 0.000 | 0.022 | 293.969 |  |  |
| rs928976 | T | C | 0.329 | 0.423 | 0.034 | 0.000 | 0.079 | 1134.914 |  |  |
| rs9303277 | T | C | 0.516 | 0.215 | 0.032 | 0.000 | 0.023 | 314.149 |  |  |
| rs9591325 | C | T | 0.055 | -0.490 | 0.076 | 0.000 | 0.025 | 336.698 |  |  |

**Supplementary Table S2. The causal effects of primary biliary cholangitis on adverse pregnancy and neonatal outcomes using inverse variance weighting.**

| **EXPOSURE: (ID ebi-a-GCST003129)** |  |  |  |  |  |  |  |  |  |  | **HETEROGENEITY** |  |  |  | **PLEITROPY** |  |  | **MR presso** |
| --- | --- | --- | --- | --- | --- | --- | --- | --- | --- | --- | --- | --- | --- | --- | --- | --- | --- | --- |
| **OUTCOME** | **METHOD** | **N SNP** | **BETA** | **SE** | **P-value** | **lCI** | **uCI** | **OR** | **ORlCI** | **ORuCI** | **METHOD** | **Q** | **Q df** | **Q p-value** | **Egger intercept** | **SE** | **P-value** | **Global test P-value** |
| miscarriage | MR Egger | 25.000 | -0.003 | 0.018 | 0.865 | -0.038 | 0.032 | 0.997 | 0.963 | 1.032 | MR Egger | 21.359 | 23.000 | 0.559 | -0.001 | 0.005 | 0.872 | 0.648 |
|  | Weighted median | 25.000 | -0.005 | 0.008 | 0.490 | -0.021 | 0.010 | 0.995 | 0.980 | 1.010 | Inverse variance weighted | 21.385 | 24.000 | 0.616 |  |  |  |  |
|  | Simple mode | 25.000 | -0.011 | 0.015 | 0.471 | -0.041 | 0.019 | 0.989 | 0.960 | 1.019 |  |  |  |  |  |  |  |  |
|  | Weighted mode | 25.000 | -0.006 | 0.012 | 0.636 | -0.029 | 0.017 | 0.994 | 0.972 | 1.018 |  |  |  |  |  |  |  |  |
|  | Inverse variance weighted (fixed effects) | 25.000 | -0.006 | 0.006 | 0.299 | -0.017 | 0.005 | 0.994 | 0.983 | 1.005 |  |  |  |  |  |  |  |  |
|  | Inverse variance weighted (multiplicative random effects) | 25.000 | -0.006 | 0.005 | 0.271 | -0.016 | 0.005 | 0.994 | 0.984 | 1.005 |  |  |  |  |  |  |  |  |
|  |  |  |  |  |  |  |  |  |  |  |  |  |  |  |  |  |  |  |
| Preeclampsia or eclampsia | MR Egger | 24.000 | 0.032 | 0.071 | 0.663 | -0.108 | 0.172 | 1.032 | 0.897 | 1.187 | MR Egger | 30.237 | 22.000 | 0.113 | -0.003 | 0.021 | 0.888 | 0.156 |
|  | Weighted median | 24.000 | 0.009 | 0.028 | 0.756 | -0.046 | 0.063 | 1.009 | 0.955 | 1.065 | Inverse variance weighted | 30.265 | 23.000 | 0.142 |  |  |  |  |
|  | Simple mode | 24.000 | 0.032 | 0.053 | 0.546 | -0.071 | 0.135 | 1.033 | 0.932 | 1.145 |  |  |  |  |  |  |  |  |
|  | Weighted mode | 24.000 | -0.002 | 0.044 | 0.966 | -0.089 | 0.085 | 0.998 | 0.915 | 1.089 |  |  |  |  |  |  |  |  |
|  | Inverse variance weighted (multiplicative random effects) | 24.000 | 0.022 | 0.022 | 0.319 | -0.021 | 0.065 | 1.022 | 0.979 | 1.067 |  |  |  |  |  |  |  |  |
|  | Inverse variance weighted (fixed effects) | 24.000 | 0.022 | 0.019 | 0.253 | -0.016 | 0.060 | 1.022 | 0.984 | 1.061 |  |  |  |  |  |  |  |  |
|  |  |  |  |  |  |  |  |  |  |  |  |  |  |  |  |  |  |  |
| Gestational diabetes | MR Egger | 23.000 | 0.043 | 0.063 | 0.496 | -0.079 | 0.166 | 1.044 | 0.924 | 1.181 | MR Egger | 22.176 | 21.000 | 0.389 | -0.019 | 0.018 | 0.303 | 0.572 |
|  | Weighted median | 23.000 | -0.044 | 0.025 | 0.083 | -0.094 | 0.006 | 0.957 | 0.911 | 1.006 | Inverse variance weighted | 23.356 | 22.000 | 0.382 |  |  |  |  |
|  | Simple mode | 23.000 | -0.052 | 0.046 | 0.268 | -0.141 | 0.038 | 0.949 | 0.868 | 1.038 |  |  |  |  |  |  |  |  |
|  | Weighted mode | 23.000 | -0.049 | 0.041 | 0.254 | -0.130 | 0.033 | 0.953 | 0.878 | 1.033 |  |  |  |  |  |  |  |  |
|  | Inverse variance weighted (multiplicative random effects) | 23.000 | -0.020 | 0.018 | 0.264 | -0.055 | 0.015 | 0.980 | 0.946 | 1.015 |  |  |  |  |  |  |  |  |
|  | Inverse variance weighted (fixed effects) | 23.000 | -0.020 | 0.017 | 0.249 | -0.054 | 0.014 | 0.980 | 0.947 | 1.014 |  |  |  |  |  |  |  |  |
|  |  |  |  |  |  |  |  |  |  |  |  |  |  |  |  |  |  |  |
| Placental abruption | MR Egger | 24.000 | 0.321 | 0.213 | 0.147 | -0.098 | 0.739 | 1.378 | 0.907 | 2.094 | MR Egger | 17.863 | 22.000 | 0.714 | -0.115 | 0.063 | 0.079 | 0.569 |
|  | Weighted median | 24.000 | -0.018 | 0.097 | 0.849 | -0.208 | 0.171 | 0.982 | 0.812 | 1.186 | Inverse variance weighted | 21.260 | 23.000 | 0.565 |  |  |  |  |
|  | Simple mode | 24.000 | -0.020 | 0.176 | 0.912 | -0.364 | 0.325 | 0.981 | 0.695 | 1.384 |  |  |  |  |  |  |  |  |
|  | Weighted mode | 24.000 | -0.020 | 0.149 | 0.896 | -0.312 | 0.272 | 0.981 | 0.732 | 1.313 |  |  |  |  |  |  |  |  |
|  | Inverse variance weighted (multiplicative random effects) | 24.000 | -0.052 | 0.065 | 0.417 | -0.179 | 0.074 | 0.949 | 0.836 | 1.077 |  |  |  |  |  |  |  |  |
|  | Inverse variance weighted (fixed effects) | 24.000 | -0.052 | 0.067 | 0.435 | -0.184 | 0.079 | 0.949 | 0.832 | 1.083 |  |  |  |  |  |  |  |  |
|  |  |  |  |  |  |  |  |  |  |  |  |  |  |  |  |  |  |  |
| Postpartum hemorrhage | MR Egger | 23.000 | 0.006 | 0.042 | 0.893 | -0.076 | 0.088 | 1.006 | 0.927 | 1.092 | MR Egger | 23.709 | 21.000 | 0.307 | -0.002 | 0.012 | 0.886 | 0.404 |
|  | Weighted median | 23.000 | 0.013 | 0.019 | 0.483 | -0.023 | 0.050 | 1.013 | 0.977 | 1.051 | Inverse variance weighted | 23.733 | 22.000 | 0.361 |  |  |  |  |
|  | Simple mode | 23.000 | 0.006 | 0.031 | 0.858 | -0.055 | 0.066 | 1.006 | 0.947 | 1.068 |  |  |  |  |  |  |  |  |
|  | Weighted mode | 23.000 | 0.014 | 0.024 | 0.575 | -0.034 | 0.062 | 1.014 | 0.967 | 1.063 |  |  |  |  |  |  |  |  |
|  | Inverse variance weighted (multiplicative random effects) | 23.000 | 0.000 | 0.013 | 0.997 | -0.026 | 0.026 | 1.000 | 0.974 | 1.027 |  |  |  |  |  |  |  |  |
|  | Inverse variance weighted (fixed effects) | 23.000 | 0.000 | 0.013 | 0.997 | -0.025 | 0.025 | 1.000 | 0.975 | 1.026 |  |  |  |  |  |  |  |  |
|  |  |  |  |  |  |  |  |  |  |  |  |  |  |  |  |  |  |  |
| Birthweight | MR Egger | 20.000 | -0.027 | 0.014 | 0.060 | -0.054 | -0.001 | 0.973 | 0.948 | 0.999 | MR Egger | 35.582 | 18.000 | 0.008 | 0.005 | 0.004 | 0.185 | 0.004 |
|  | Weighted median | 20.000 | -0.012 | 0.004 | 0.006 | -0.020 | -0.003 | 0.988 | 0.980 | 0.997 | Inverse variance weighted | 39.332 | 19.000 | 0.004 |  |  |  |  |
|  | Simple mode | 20.000 | -0.011 | 0.009 | 0.250 | -0.028 | 0.007 | 0.989 | 0.972 | 1.007 |  |  |  |  |  |  |  |  |
|  | Weighted mode | 20.000 | -0.015 | 0.008 | 0.079 | -0.031 | 0.001 | 0.985 | 0.969 | 1.001 |  |  |  |  |  |  |  |  |
|  | Inverse variance weighted (multiplicative random effects) | 20.000 | -0.009 | 0.004 | 0.018 | -0.017 | -0.002 | 0.991 | 0.983 | 0.998 |  |  |  |  |  |  |  |  |
|  | Inverse variance weighted (fixed effects) | 20.000 | -0.009 | 0.003 | 0.001 | -0.015 | -0.004 | 0.991 | 0.985 | 0.996 |  |  |  |  |  |  |  |  |
|  |  |  |  |  |  |  |  |  |  |  |  |  |  |  |  |  |  |  |
| Gestational age | MR Egger | 24.000 | -0.015 | 0.012 | 0.211 | -0.038 | 0.008 | 0.985 | 0.963 | 1.008 | MR Egger | 12.543 | 22.000 | 0.945 | 0.002 | 0.003 | 0.508 | 0.944 |
|  | Weighted median | 24.000 | -0.009 | 0.005 | 0.089 | -0.018 | 0.001 | 0.991 | 0.982 | 1.001 | Inverse variance weighted | 12.996 | 23.000 | 0.952 |  |  |  |  |
|  | Simple mode | 24.000 | -0.003 | 0.009 | 0.703 | -0.021 | 0.014 | 0.997 | 0.979 | 1.014 |  |  |  |  |  |  |  |  |
|  | Weighted mode | 24.000 | -0.007 | 0.009 | 0.430 | -0.024 | 0.010 | 0.993 | 0.977 | 1.010 |  |  |  |  |  |  |  |  |
|  | Inverse variance weighted (multiplicative random effects) | 24.000 | -0.008 | 0.003 | 0.007 | -0.013 | -0.002 | 0.992 | 0.987 | 0.998 |  |  |  |  |  |  |  |  |
|  | Inverse variance weighted (fixed effects) | 24.000 | -0.008 | 0.004 | 0.043 | -0.015 | 0.000 | 0.992 | 0.985 | 1.000 |  |  |  |  |  |  |  |  |
|  |  |  |  |  |  |  |  |  |  |  |  |  |  |  |  |  |  |  |
| Preterm birth | MR Egger | 24.000 | 0.035 | 0.060 | 0.564 | -0.083 | 0.154 | 1.036 | 0.920 | 1.166 | MR Egger | 25.292 | 22.000 | 0.283 | 0.002 | 0.018 | 0.903 | 0.336 |
|  | Weighted median | 24.000 | 0.022 | 0.027 | 0.417 | -0.031 | 0.074 | 1.022 | 0.970 | 1.077 | Inverse variance weighted | 25.309 | 23.000 | 0.335 |  |  |  |  |
|  | Simple mode | 24.000 | -0.018 | 0.049 | 0.724 | -0.114 | 0.079 | 0.983 | 0.893 | 1.082 |  |  |  |  |  |  |  |  |
|  | Weighted mode | 24.000 | 0.000 | 0.039 | 0.995 | -0.077 | 0.077 | 1.000 | 0.926 | 1.080 |  |  |  |  |  |  |  |  |
|  | Inverse variance weighted (multiplicative random effects) | 24.000 | 0.042 | 0.019 | 0.025 | 0.005 | 0.080 | 1.043 | 1.005 | 1.083 |  |  |  |  |  |  |  |  |
|  | Inverse variance weighted (fixed effects) | 24.000 | 0.042 | 0.018 | 0.019 | 0.007 | 0.078 | 1.043 | 1.007 | 1.081 |  |  |  |  |  |  |  |  |

**Supplementary Table S3.** Sensitivity analysis of MR analysis between PBC, adverse pregnancy and neonatal outcomes.

| **OUTCOME** | **nIVs** | **Heterogeneity test** | | | |  | **Pleiotropy test** | |
| --- | --- | --- | --- | --- | --- | --- | --- | --- |
| **Egger_Q** | **Q_pval** | **IVW_Q** | **Q_pval** |  | **Egger_intercept** | **P** |
| miscarriage | 25 | 21.359 | 0.559 | 21.385 | 0.616 |  | 21.359 | 0.559 |
| Preeclampsia or eclampsia | 24 | 30.237 | 0.113 | 30.265 | 0.142 |  | 30.237 | 0.113 |
| Gestational diabetes | 23 | 22.176 | 0.389 | 23.356 | 0.382 |  | 22.176 | 0.389 |
| Placental abruption | 24 | 17.863 | 0.714 | 21.260 | 0.565 |  | 17.863 | 0.714 |
| Postpartum hemorrhage | 23 | 23.709 | 0.307 | 23.733 | 0.361 |  | 23.709 | 0.307 |
| Birthweight | 20 | 35.582 | 0.008 | 39.332 | 0.004 |  | 35.582 | 0.008 |
| Gestational age | 24 | 12.543 | 0.945 | 12.996 | 0.952 |  | 12.543 | 0.945 |
| Preterm birth | 24 | 25.292 | 0.283 | 25.309 | 0.335 |  | 25.292 | 0.283 |

**Supplementary Figure S1.**


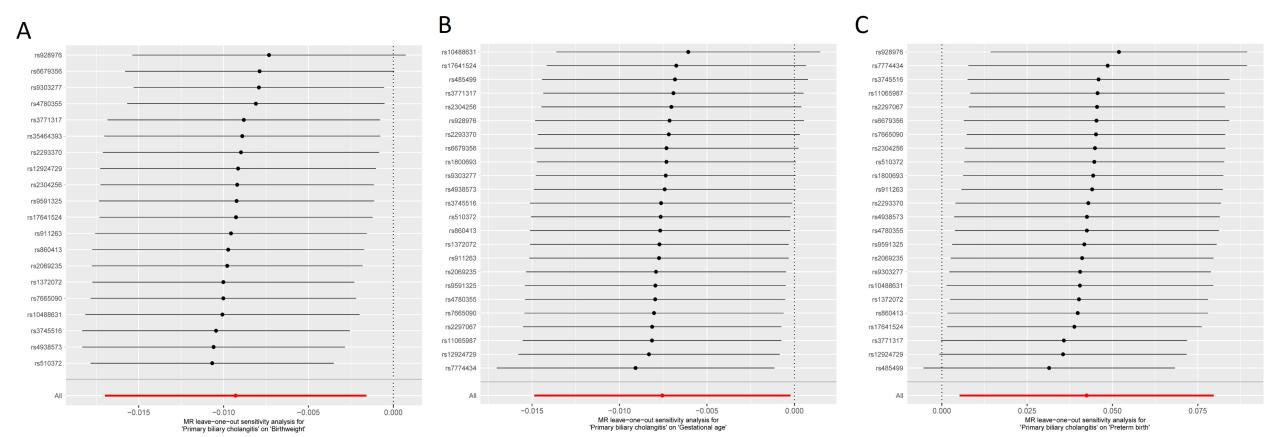


Results of the leave-one-out sensitivity analysis. (A) MR leave-one-out sensitivity analysis for ‘PBC' on ‘Low birth weight'. (B) MR leave-one-out sensitivity analysis for ‘PBC’ on ‘Gestational age'. (C) MR leave-one-out sensitivity analysis for ‘PBC' on ‘Preterm birth'. MR, Mendelian randomization.
